# Supplementary material for: Siwei Jianbu decoction improves painful paclitaxel-induced peripheral neuropathy in mouse model by modulating the NF-κB and MAPK signaling pathways
Source: PubMed Central journal article supplement (PMC7583579; doi:10.1051/rmr/200001), 2020-10-20
Supplement: rmr-8-2-s1.pdf [file rmr-8-2-s1.pdf]

Supplementary data

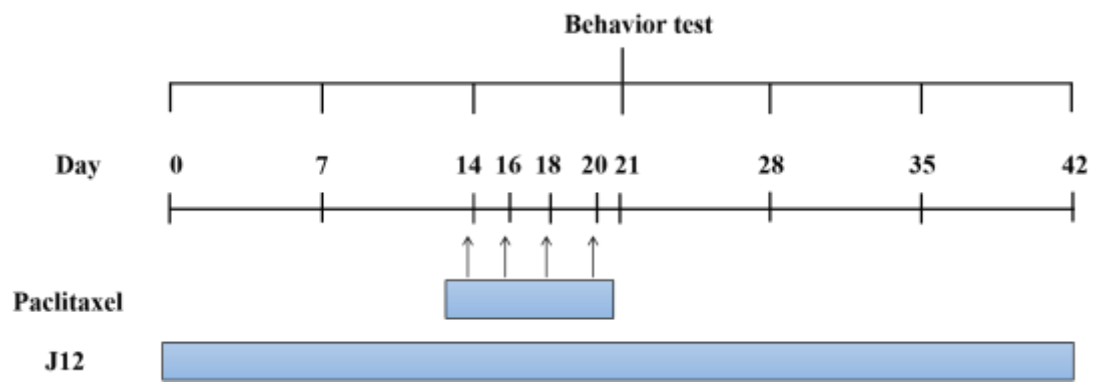

Figure S1. Paclitaxel-induced neuropathy model and drugs administration.
